# Supplementary material for: Doratoxylon apetalum, an Indigenous Medicinal Plant from Mascarene Islands, Is a Potent Inhibitor of Zika and Dengue Virus Infection in Human Cells
Source: PubMed Central journal article supplement (PMC6567149; doi:10.3390/ijms20102382), 2019-05-14
Supplement: ijms-20-02382-s001.pdf [file ijms-20-02382-s001.pdf]

## Supplementary data

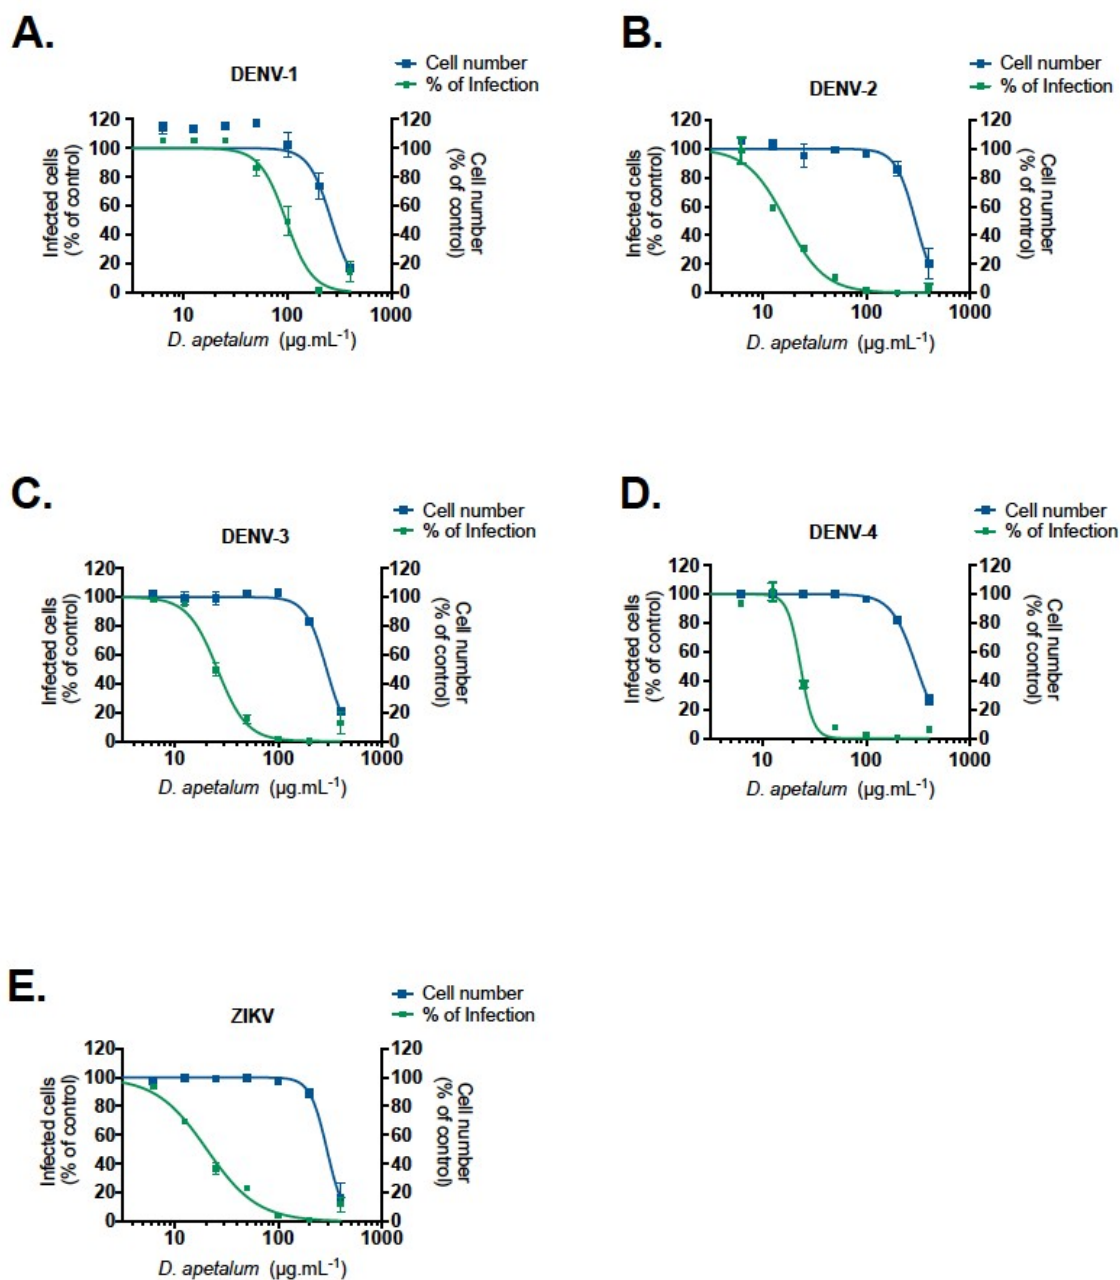

**Figure S1:** *D. apetalum* extract show a dose-dependent antiviral effect against four DENV clinical isolates and an epidemic Brazilian ZIKV strain. Huh7.5 cells were infected during 48 h with DENV at different MOI 2, 2, 0.5 and 2 for DENV 1-4 (A, B, C, D) respectively and MOI of 2 for Brazilian epidemic ZIKV strain (E). Cells were continuously incubated with different concentrations of *D. apetalum* extract for 48 h. The percentages of infected cells (E positive cells) and cell number were evaluated using the Operetta High-Content Imaging System. Results are means  $\pm$  SD performed in triplicate and are expressed as relative values compared to Mock-infected cells.
